# Supplementary material
Source: ML conference proceedings conference paper supplement (https://openreview.net/forum?id=XFctwAb9UL)
Supplement: supplementary_material [file attachment]

Read me:

1: The environment is based on Python3.6, TensorFlow 2.x, (the default setting of Colab).

2: To run the dataset, you need to open the. ipynb and drag all the files under the folder “environment_dataset(n)” to the “content page” (base page)

3: We recommend you test all codes in Colab in case of version conflict.
